# Supplementary material for: Critical biodegradation process of a widely used surfactant in the water environment: dodecyl benzene sulfonate (DBS)
Source: Royal Society of Chemistry journal article supplement (doi:10.1039/d1ra02791c), 2021-01-01
Supplement: d1ra02791c1.pdf [file d1ra02791c1.pdf]

1 Critical biodegradation process of a widely used surfactant in  
2 the water environment: Dodecyl benzene sulfonate (DBS)

3 Yu Gu,<sup>1</sup> Yanting Qiu,<sup>1, a</sup> Xiuyi Hua,<sup>1</sup> Zhimin Shi,<sup>1, b</sup> Anfeng Li,<sup>1</sup> Yang Ning,<sup>1</sup> and  
4 Dapeng Liang<sup>\*,1</sup>

5 <sup>1</sup> Key Lab of Groundwater Resource and Environment Ministry of Education, College  
6 of New Energy and Environment, Jilin University, Changchun, 130012, China.

7 <sup>a</sup>now at: State Key Laboratory of Environmental Simulation and Pollution Control,  
8 College of Environmental Sciences and Engineering, Peking University, Beijing,  
9 100871, China

10 <sup>b</sup> now at: State Key Laboratory of Environmental Simulation and Pollution Control,  
11 School of Environment, Beijing Normal University, Beijing, 100875, China

12

13

14 **\*Corresponding author:**

15 Dapeng Liang

16 E-mail: liangdp@jlu.edu.cn

17

18

19

20

21

22

23

24

25

26

27

28

29

30 Supporting Information

31 **1. Optimization of experimental conditions and quantitative analysis**

32 1.1 ESE voltage

33 1.2 Injection rate

34 1.3 Temperature of ion-transfer capillary (Fig. S1 included)

35 1.4 Quantitative analysis of DBS (Fig. S2 included)

36 **Fig. S3 The ESI-MS spectra of blank control at 0 h (A), 6 h (B), 12 h (C) during**  
37 **the experiment.**

38 **Fig. S4 The MS2 spectra of m/z 355.15869 (A), 327.12720 (B), 299.09473 (C),**  
39 **271.06379 (D), 243.03234 (E).**

40 **Fig. S5 The MS2 spectra of m/z 215.00125 (A), 200.98528 (B), 121.02892 (C) and**  
41 **117.01806 (D).**

42 **Fig. S6 The MS spectra of DBS degraded in the nature water (East Lake in Jilin**  
43 **University, China) at 0 h (A) 12 h (B), and the blank control (C).**

44 **Fig. S7 Schematic illustration of sample preparation and ESI-MS detection.**

45 **Fig. S8 The microscope photo of *Chlorella vulgaris* used in the experiment.**

46 **Fig. S9 The mass spectra of the mixed solution of DBS and *Chlorella* under dark**  
47 **conditions of 0 hours and 12 hours**

48 **Table. S1 The products of DBS degraded by *Chlorella vulgaris***

49

## 51 1. Optimization of experimental conditions and quantitative analysis

52 For better performance during ESI-MS analysis, some important experimental  
53 parameters were investigated systematically, including ESI voltage, sample injection  
54 rate and temperature of ion-transport capillary. All experiments were performed in six  
55 times, and the concentration of DBS in experimental water samples was 0.2 mg/L.

56

### 57 1.1 ESI voltage

58 The effect of different electrospray voltages (2.0 - 4.0 kV) on the signal intensity of  
59 the characteristic fragment  $m/z$  183.01 is shown in Fig. S1A. At the range of 2.0-3.5  
60 kV, more samples were ionized because of the higher voltage. For this reason,  
61 stronger signal intensity observed. And it showed a decrease trend when the voltage  
62 increases to 4.0 kV. As the voltage is excessively high, the corona discharge occurs at  
63 the spray outlet, which affects the ionization of ions. Thus, the ESI voltage of 3.5 kV  
64 were used for detection DBS.

65

### 66 1.2 Injection rate

67 To obtain a better signal intensity of the characteristic fragment  $m/z$  183.01, different  
68 sample injection rate (5-45  $\mu\text{L}/\text{min}$ ) were experimentally investigated. The effect of  
69 sample injection rate of fragment  $m/z$  183.01 is shown in Fig. S2B. As expected, the  
70 target signal intensity was obviously increased with the increasing of sample injection  
71 rate. Because more ions were detected by Mass Spectrometry in spray jet. While the  
72 sample injection rate was kept at 45  $\mu\text{L}/\text{min}$ , the intensity of  $m/z$  183.01 was slightly  
73 lower than that obtained at the injection rate was 35  $\mu\text{L}/\text{min}$ . As sample solution do  
74 not show welly ionization because of high injection rate. In this work, the sample  
75 injection rate was set as 35  $\mu\text{L}/\text{min}$ .

76

### 77 1.3 Temperature of ion-transfer capillary

78 Increasing the temperature of ion-transfer capillary can promote the nebulization  
79 process of charged droplets, resulting in a better efficiency of producing gaseous  
80 species. In the range of 200-400  $^{\circ}\text{C}$ , the characteristic fragment  $m/z$  183.01 obtained  
81 best signal intensity at the 300  $^{\circ}\text{C}$ . The effect of ion-transfer capillary temperature of

82 fragment  $m/z$  183.01 was shown in Fig. S1C. While the temperature was higher, the  
83 signal intensity decreased because of thermal dissociation of DBS. Thus 300 °C of  
84 ion-transfer temperature was used in this work.

85

#### 86 1.4 Quantitative analysis of DBS

87 The signal intensity of  $m/z$  183.01 in MS<sup>2</sup> spectra showed a linear response with DBS  
88 concentrations over the range 1.0-400.0 µg/L ( $R^2 = 0.9993$ ) and the curve fitting  
89 equation was  $y = 1216.58x + 2655.2$ . The working curve of DBS was shown in Fig.  
90 S2. A limit of detection (LOD) of 0.52 µg/L was obtained by a signal-to-noise ratio  
91 (S/N) of 3. The relative standard deviations (RSDs) of twelve replicates for DBS  
92 ranging from 1.0-400.0 µg/L were less than 10.5%. The limit of quantification (LOQ)  
93 of 6.36 µg/L was obtained by a S/N of 10. The recover experiment was also carried  
94 out for 12 times with the addition of 200.0 µg/L DBS standard solution. The recovery  
95 of DBS was from 97.8% to 100.1% and the mean recovery of DBS was 98.6%. A  
96 short time estimated less than 2 min was taken for each measurement.

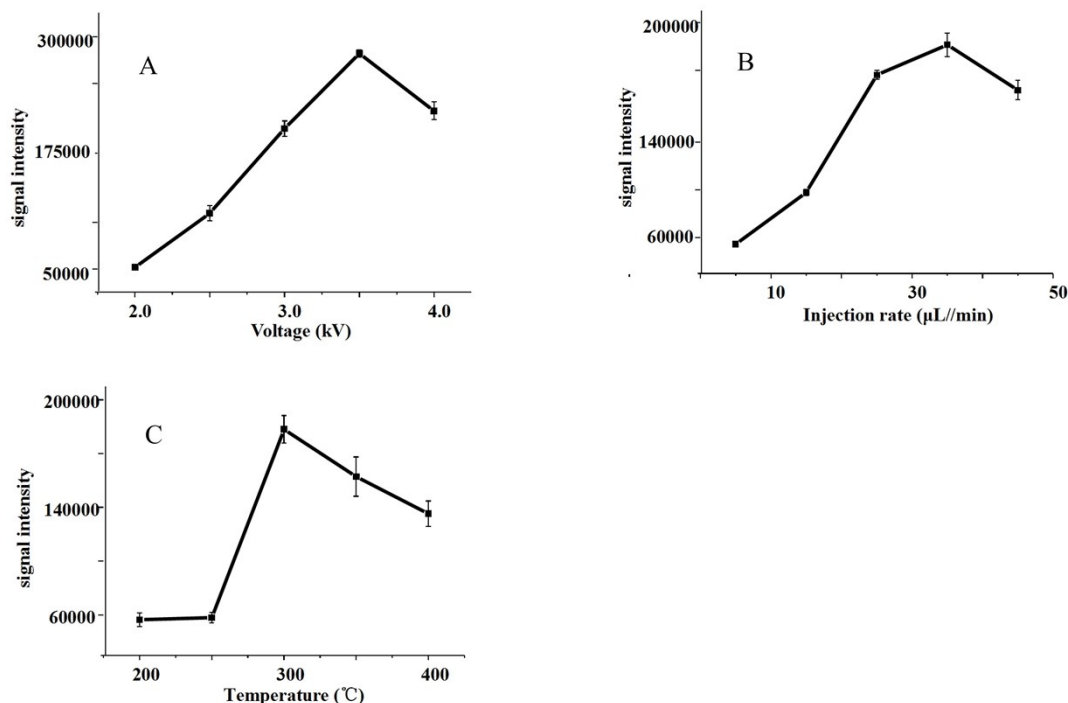

97

98 Fig. S1 The signal intensity of  $m/z$  183.01 of the secondary fragment ion with  
99 different ESI voltage (A); flow rate of sample solution (B); temperature of ion-  
100 transfer tube (C).

101

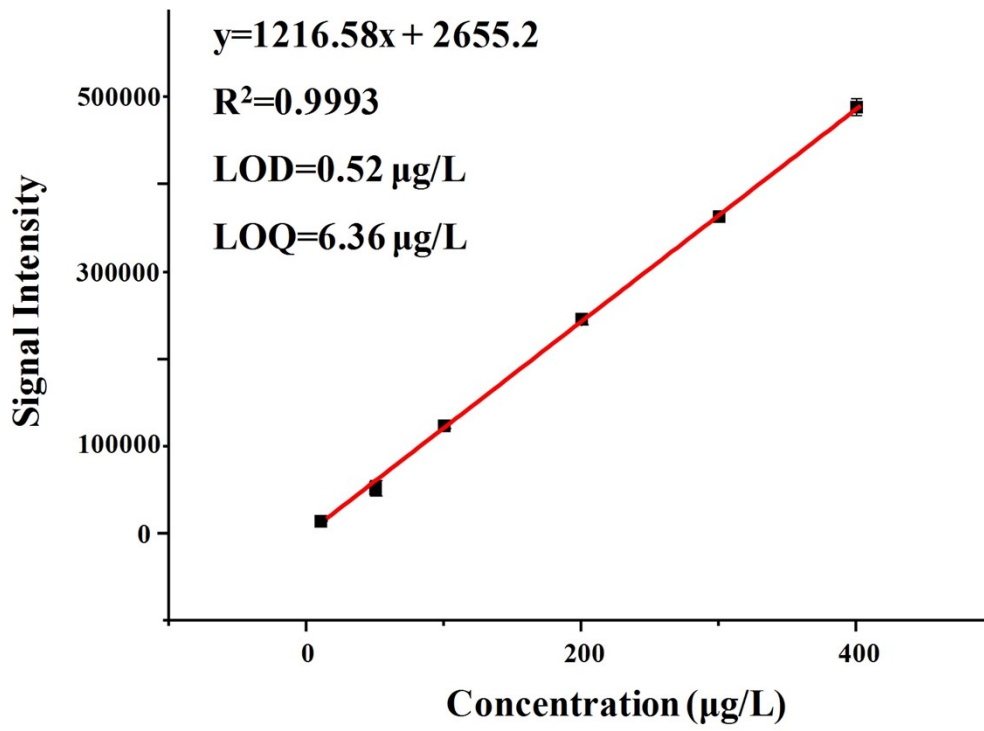

102

103 Fig. S2 The working curve of signal intensity of  $m/z$  183.01 to concentration of DBS

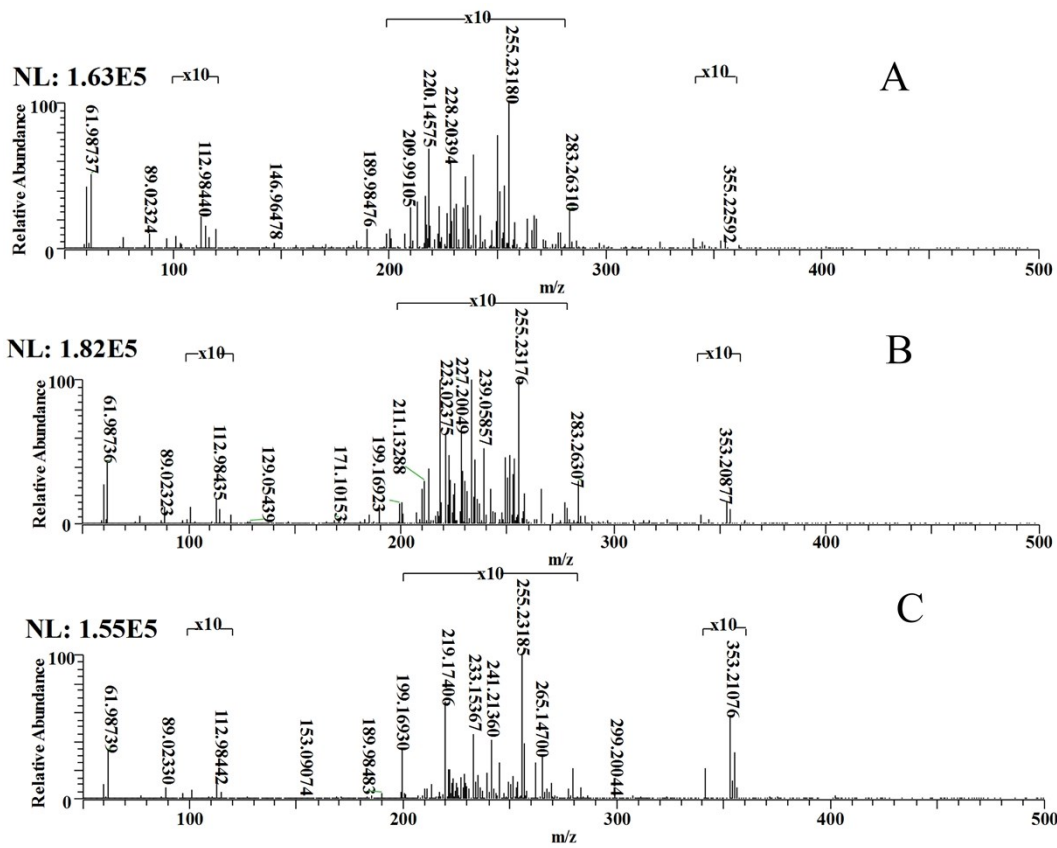

105

106 Fig. S3 The ESI-MS spectra of blank control at 0 h (A), 6 h (B), 12 h (C) during the  
 107 experiment.

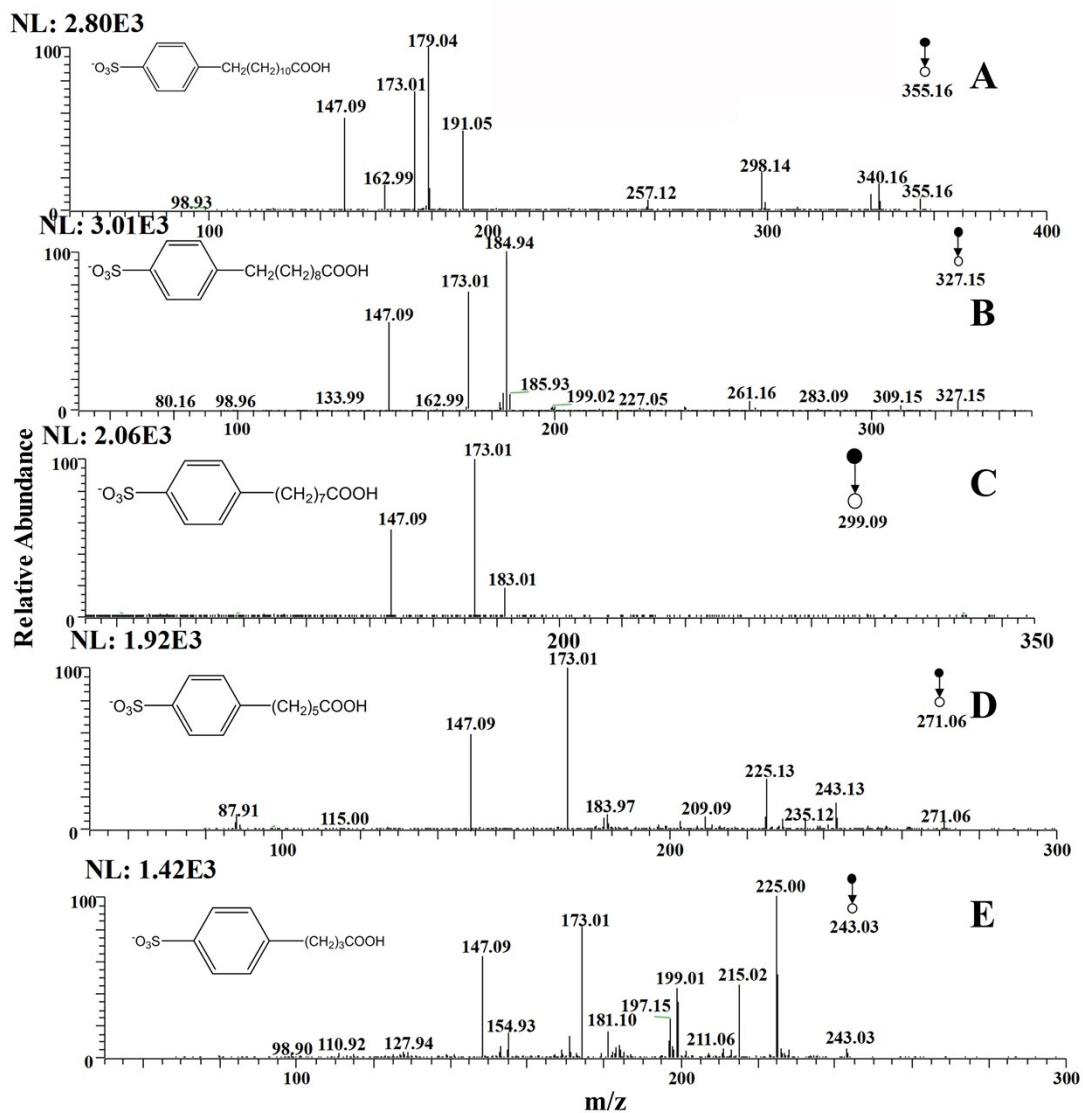

109  
 110 Fig. S4 The MS<sup>2</sup> spectra of *m/z* 355.15869 (A), 327.12720 (B), 299.09473 (C),  
 111 271.06379 (D), 243.03234 (E).

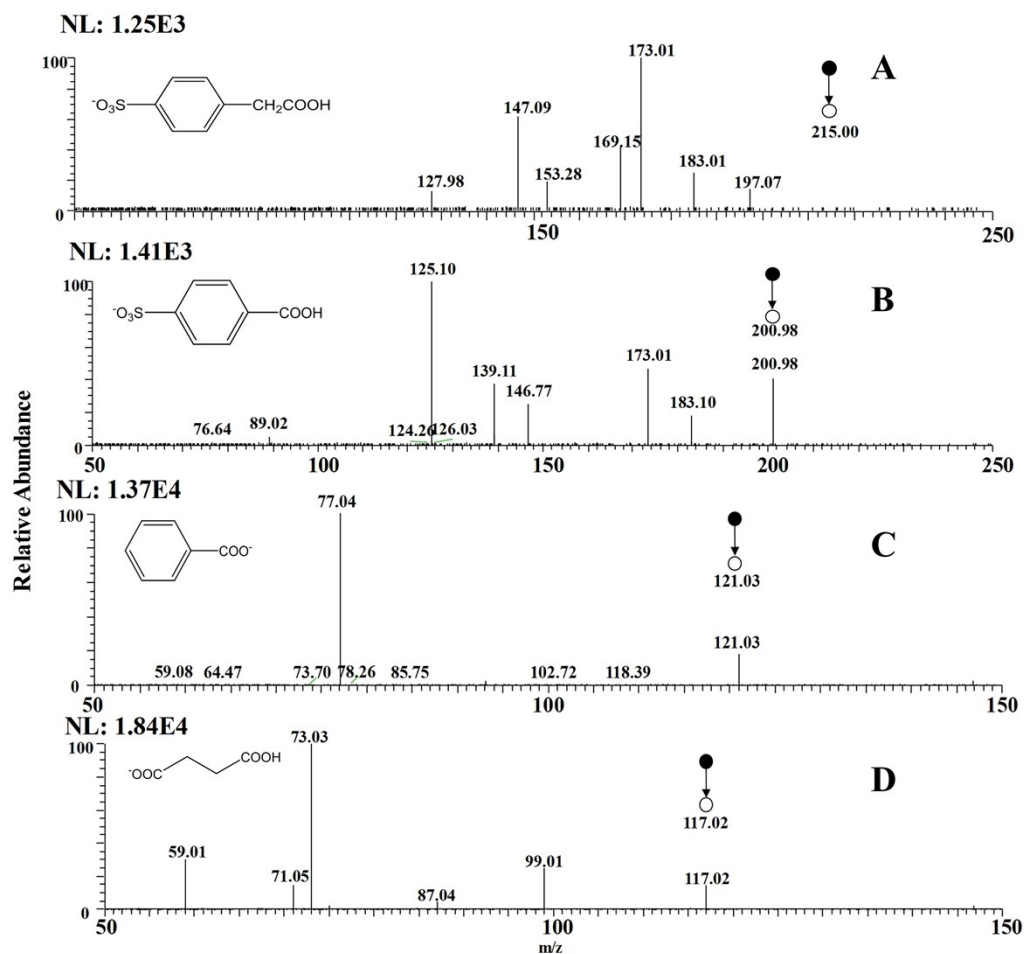

113

114 Fig. S5 The MS<sup>2</sup> spectra of *m/z* 215.00125 (A), 200.98528 (B), 121.02892 (C) and

115

117.01806 (D).

116



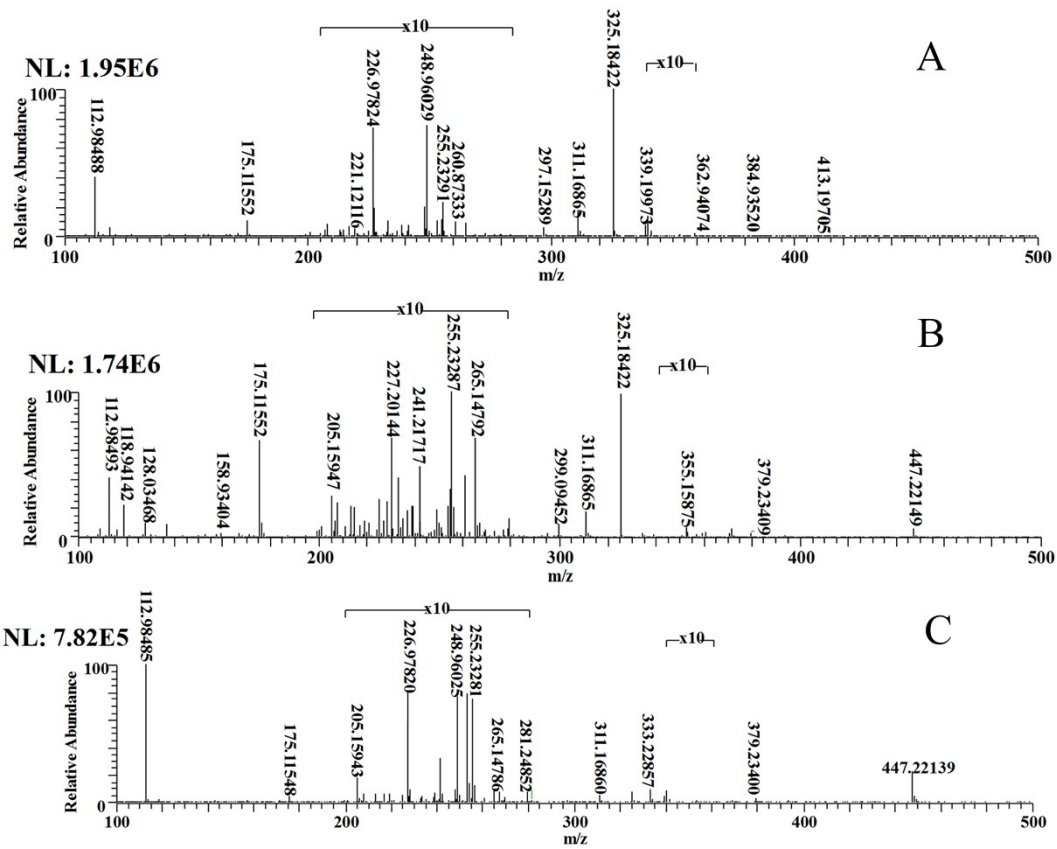

118

119 Fig. S6 The MS spectra of DBS degraded in the nature water (East Lake in Jilin  
 120 University, China) at 0 h (A) 12 h (B), and the blank control (C).

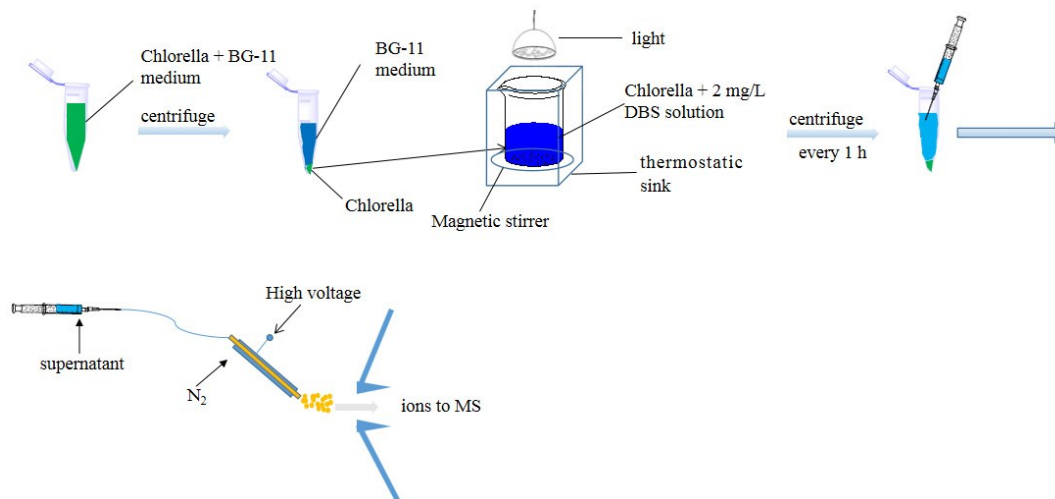

122

123 Fig. S7 Schematic illustration of sample preparation and ESI-MS detection.

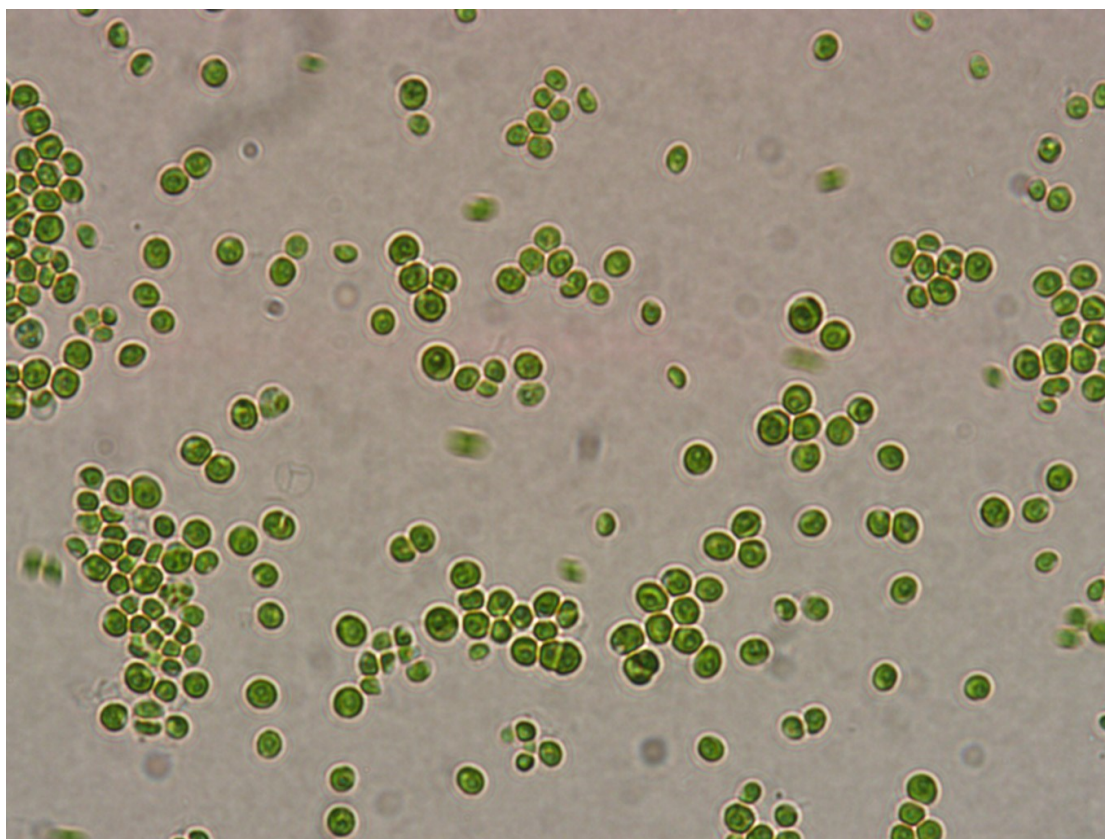

125

126 Fig. S8 The microscope photo of *Chlorella vulgaris* used in the experiment.

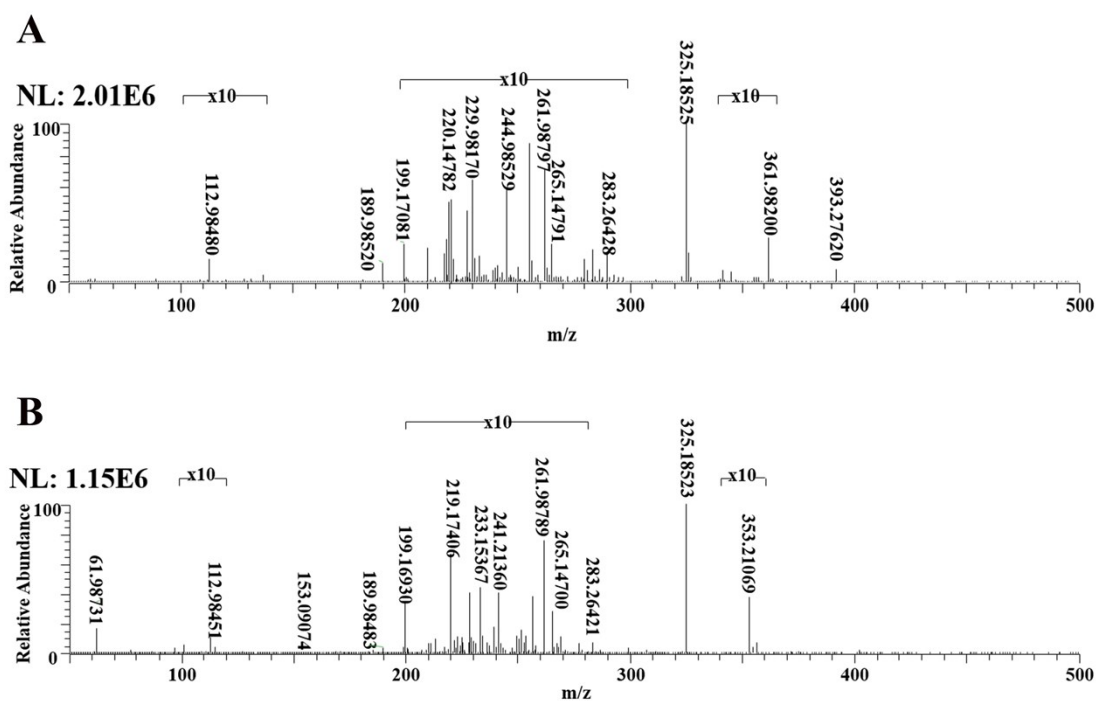

127

128 Fig. S9 The mass spectra of the mixed solution of DBS and *Chlorella* under dark  
129 conditions of 0 hours and 12 hours

Table. S1 The products of DBS degraded by *Chlorella vulgaris*

| Compound                                   | <i>m/z</i>   |            | Molecular formula                                  | Error, 10 <sup>-6</sup> |
|--------------------------------------------|--------------|------------|----------------------------------------------------|-------------------------|
|                                            | Experimental | Calculated |                                                    |                         |
| 4-Sodium<br>sulfophenyldodecanoate<br>acid | 355.15869    | 355.15737  | C <sub>18</sub> H <sub>27</sub> O <sub>5</sub> SNa | 3.72                    |
| 4-Sodium<br>sulfophenyldecane acid         | 327.12720    | 327.12607  | C <sub>16</sub> H <sub>23</sub> O <sub>5</sub> SNa | 3.45                    |
| 4-Sodium<br>sulfophenylcatane acid         | 299.09473    | 299.09477  | C <sub>14</sub> H <sub>19</sub> O <sub>5</sub> SNa | 1.34                    |
| 4-Sodium<br>sulfophenylhexane acid         | 271.06379    | 271.06347  | C <sub>12</sub> H <sub>15</sub> O <sub>5</sub> SNa | 1.18                    |
| 4-Sodium<br>sulfophenylbutane acid         | 243.03234    | 243.03217  | C <sub>10</sub> H <sub>11</sub> O <sub>5</sub> SNa | 0.70                    |
| 4-Sodium sulfobenzoic<br>acid              | 215.00125    | 215.00087  | C <sub>8</sub> H <sub>7</sub> O <sub>5</sub> SNa   | 1.77                    |
| Benzoic acid [26]                          | 121.02892    | 121.02841  | C <sub>7</sub> H <sub>6</sub> O <sub>2</sub>       | 4.21                    |
| Benzene [26]                               | 77.03872     | 77.03858   | C <sub>6</sub> H <sub>6</sub>                      | 1.82                    |
| Butane dioic acid                          | 117.01806    | 117.01824  | C <sub>4</sub> H <sub>6</sub> O <sub>4</sub>       | 1.54                    |
| Ethanoic acid [54]                         | 59.01227     | 59.01276   | C <sub>2</sub> H <sub>4</sub> O <sub>2</sub>       | 8.30                    |
